# Supplementary material for: Preclinical Characterization of RSM-932A, a Novel Anticancer Drug Targeting the Human Choline Kinase Alpha, an Enzyme Involved in Increased Lipid Metabolism of Cancer Cells
Source: Oxford University Press journal article supplement (doi:10.1158/1535-7163.mct-14-0531), 2014-12-09

**Supplementary Data**

**Supplementary Table 1S. Growth Media for each cell line used in the study and reported in Table 5.** All cell lines used in this study were obtained from the American Type Culture Collection, Rockville, MD. Cells were maintained in the indicated growth media as suggested by the provider under standard conditions at 37 ºC, 5% CO2 and 98% humidity.

| **Cell line** | **Growth Media** |
| --- | --- |
| MDA.MB.468 | *DEMEM* supplemented with 10% fetal bovine serum (Invitrogen, Gaithersburg, MD, USA) |
| T47D | *DEMEM* supplemented with 10% fetal bovine serum |
| SkBr-3 | *DEMEM* supplemented with 10% fetal bovine serum |
| MDA.MB.231 | *DEMEM* supplemented with 10% fetal bovine serum |
| H510 | *RPMI* Media 1640 supplemented with 10% fetal bovine serum |
| H1299 | *RPMI* Media 1640 supplemented with 10% fetal bovine serum |
| H460 | *RPMI* Media 1640 supplemented with 10% fetal bovine serum |
| DLD-1 | *RPMI* Media 1640 supplemented with 10% fetal bovine serum |
| HCT-116 | *McCoy's 5A* Medium supplemented with 10% fetal bovine serum |
| SW620 | *DEMEM* supplemented with 10% fetal bovine serum |
| HT-29 | *DEMEM* supplemented with 10% fetal bovine serum |
| TccSup | *MEM* supplemented with 10% fetal bovine serum |
| HT-1376 | *MEM* supplemented with 10% fetal bovine serum |
| J82 | *MEM* supplemented with 10% fetal bovine serum |
| SW780 | *RPMI* Media 1640 supplemented with 10% fetal bovine |
| A431 | *DEMEM* supplemented with 10% fetal bovine serum |
| HepG2 | *MEM* supplemented with 10% fetal bovine serum |
| Hep3B2 | *MEM* supplemented with 10% fetal bovine serum |
| SK-OV-3 | *McCoy's 5A* Medium supplemented with 10% fetal bovine |
| OV-Car-3 | *RPMI* Media 1640 supplemented with 20% fetal bovine serum |
| SAOS-2 | *McCoy's 5A* Medium supplemented with 10% fetal bovine serum |
| HeLa | *DEMEM* supplemented with 10% fetal bovine serum |
| 769-P | *RPMI* Media 1640 supplemented with 10% fetal bovine serum |
| SKMel-28 | *EMEM* (ATCC, Catalog No. 30-2003) supplemented with 10% FBS |
| A-375 | *DEMEM* supplemented with 10% fetal bovine serum |
| Mia.PaCa.2 | *DEMEM* supplemented with 10% fetal bovine serum |
| U-87 | *DEMEM* supplemented with 10% fetal bovine serum |
| MCF10-A | *DMEM/F12* supplemented with 10% fetal calf serum, Insuline (100µmL), Choleric Toxin (100ng/mL), EGF (20ngr/mL) and Hydrocortisone (5µL/mL) |

**Supplementary Figure 1S.- Structure of choline kinase inhibitors.** All inhibitors are derivatives of the general structure depicted in the upper image (I). Each compound is referred as substitutes for each residue NR1-2, R3-4, NR’1-2, R’3-4, or the spacer (A).


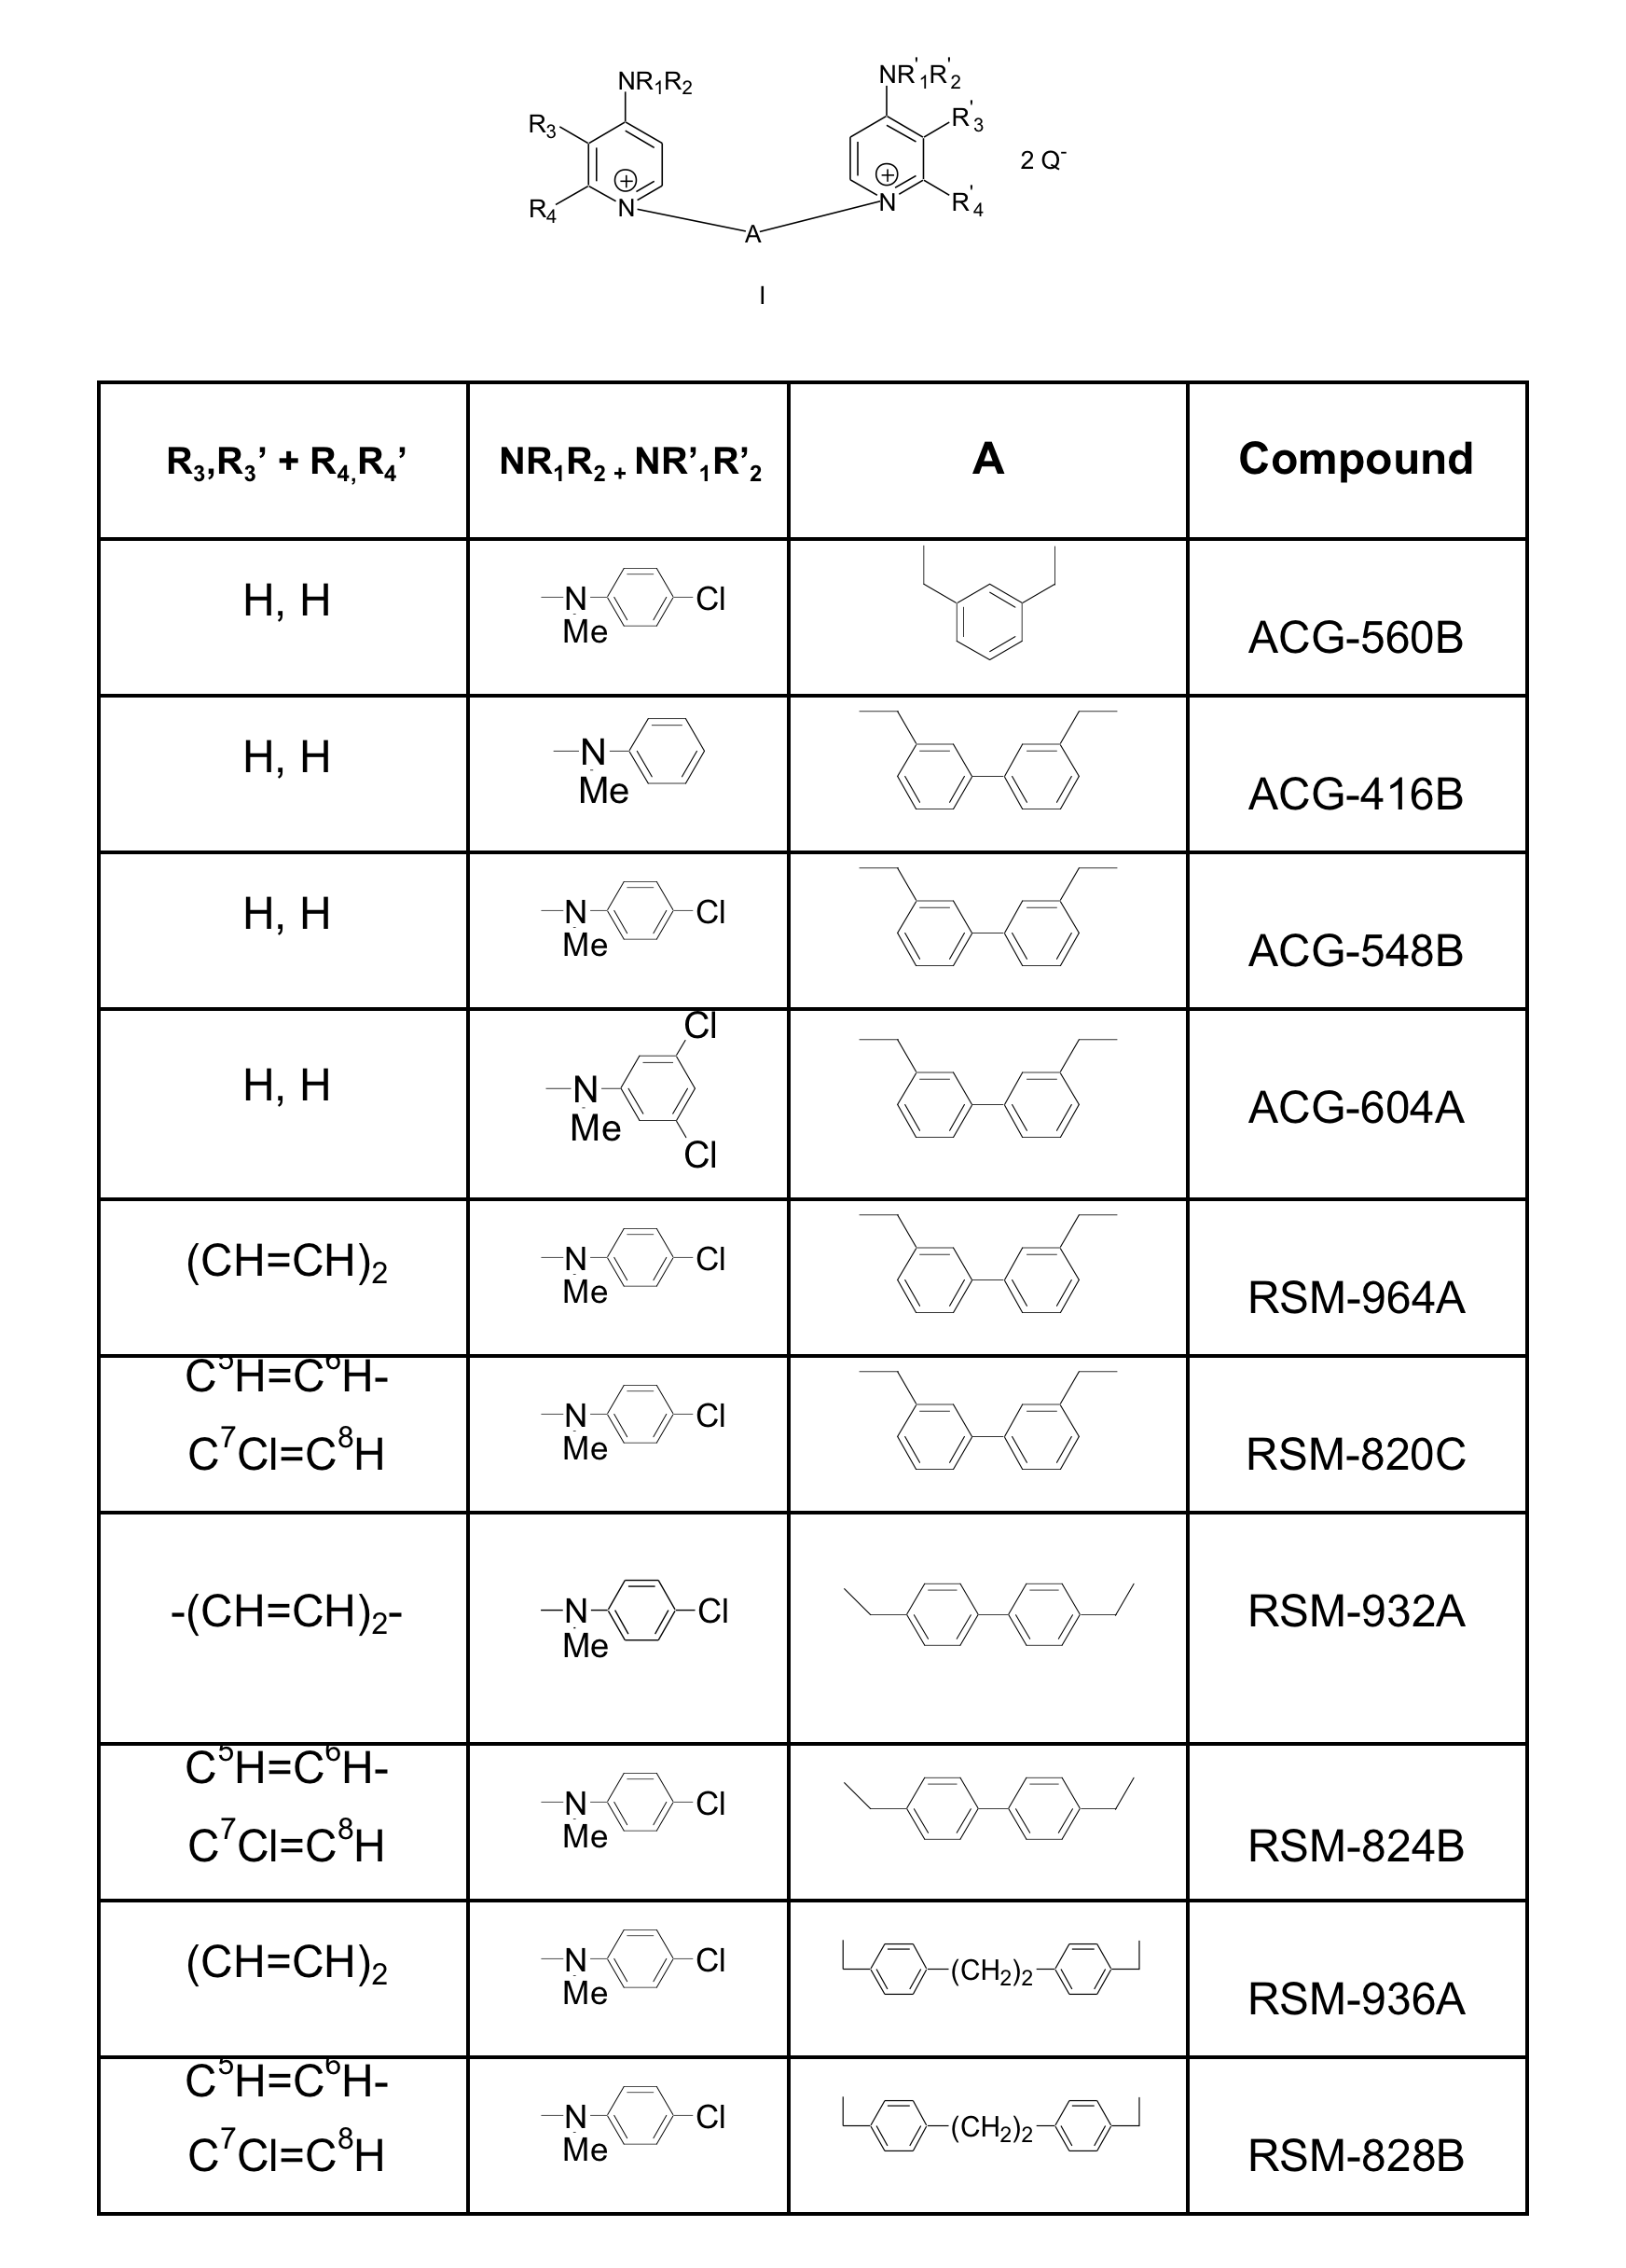

Supplement: 15357163mct140531-sup-133588_1_supp_2670378_ncb89f.docx [file 15357163mct140531-sup-133588_1_supp_2670378_ncb89f.docx]
